# Supplementary material
Source: PubMed Central journal article supplement (PMC6326845)
Supplement: NIHMS991732-supplement-2.pdf [file NIHMS991732-supplement-2.pdf]

## Supplemental Figures and Associated Legends

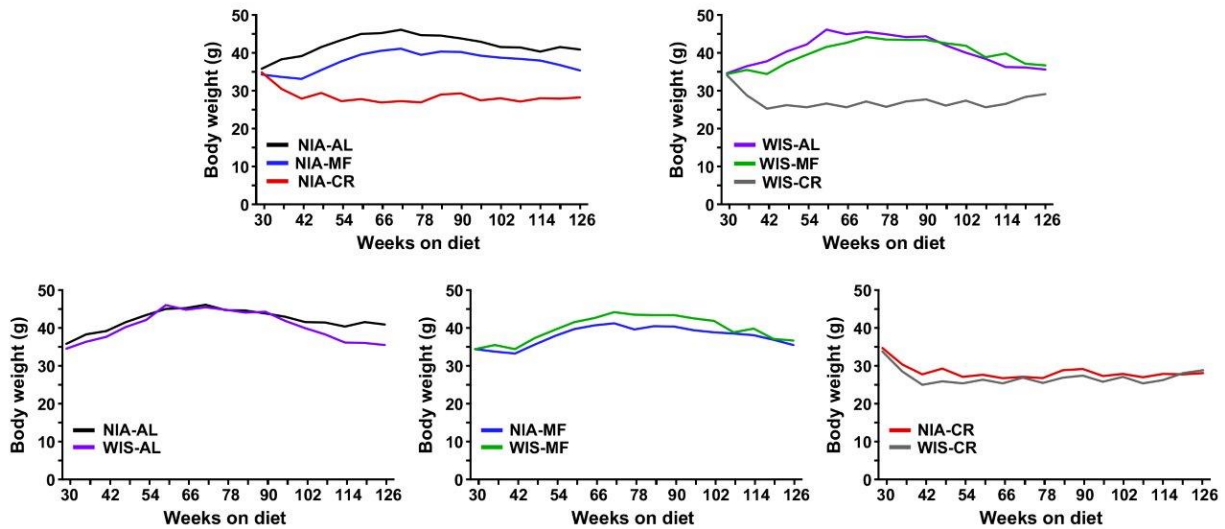

**Figure S1.** Bodyweight trajectories, **Related to Figure 1C.** Bodyweight trajectories for mice on NIA diet (upper, left panel) or WIS diet (upper right panel) for a period of 96 weeks. Lower panels depict bodyweight trajectories between NIA- and WIS-fed mice among the three feeding paradigms: AL (left panel), MF (middle panel) and CR (right panel).

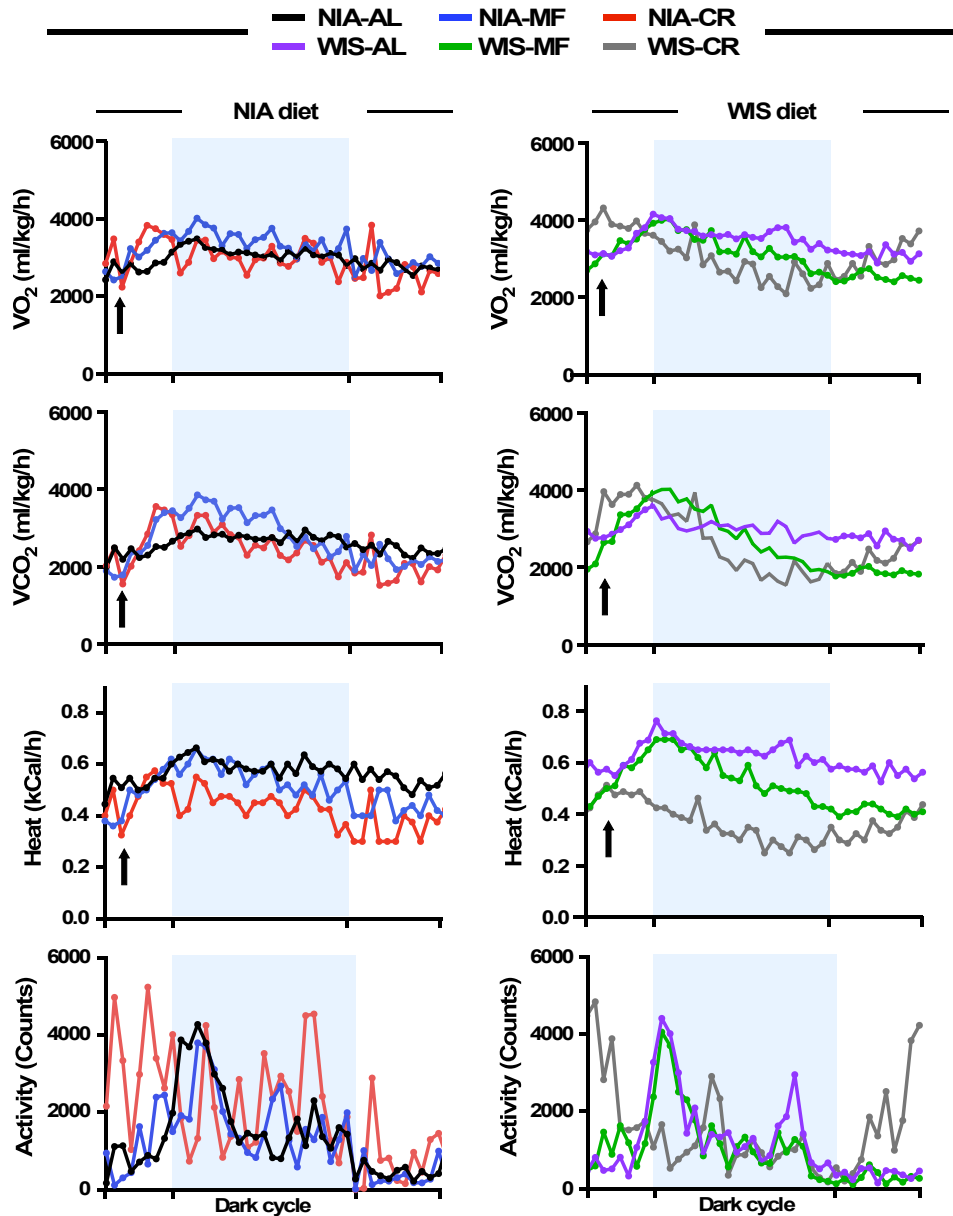

**Figure S2.** Metabolic assessments, **Related to Figure 1D.** At 41-42 months of age, mice were placed into metabolic cages to measure oxygen utilization ( $VO_2$ ), carbon dioxide production ( $VCO_2$ ), heat generation, and spontaneous activity as detailed in the STAR Methods.  $n=5-6$  per group.

At meal time (3:00 PM), NIA-fed mice under CR showed rapid rise in  $VCO_2$  and  $VO_2$  and then followed trajectories similar as AL mice, while MF mice maintained larger  $VCO_2$  and  $VO_2$  values well in the dark cycle before returning to baseline levels (Fig. S2). Interestingly, the metabolism in WIS-fed mice under CR was more rapid at meal time but markedly decelerated at the onset of the dark cycle; falling well below the AL levels and consistent with fat fueling (Fig. S2). In MF mice on WIS diet, the  $VCO_2$  and  $VO_2$  values peaked at the onset of the dark cycle before slowly returning to baseline levels. Heat production rose in all groups of mice at meal time,

but followed different trajectories thereafter depending on the eating pattern and diet composition. For instance, mice under AL had the highest heat production at baseline, peaking at the onset of the dark cycle and remaining elevated throughout the night irrespective of diet type. Mice under MF exhibited sharp increase in heat production at meal time to reach levels comparable to those of AL mice. Note the faster rate of decline in heat production in WIS-fed mice than mice on the NIA diet at the onset of the dark cycle (Fig. S2). Diet composition had a profound impact on heat production in mice under CR especially when fed the WIS diet. Both MF and AL mice were most active at the onset of the dark cycle regardless of diet type. CR mice on the NIA diet appeared active at meal time and throughout the dark cycle whereas WIS-fed mice under CR were most active when anticipating meal time.

**Table S1. Diet composition, Related to Figure 1A.**

| Ingredients                               | NIA diet      |        |                      | WIS diet      |        |               |
|-------------------------------------------|---------------|--------|----------------------|---------------|--------|---------------|
|                                           | (% by weight) | % kcal | Sources              | (% by weight) | % kcal | Sources       |
| Protein                                   | 17.5          | 19.7   | Soybean, fish meal   | 13.1          | 13.4   | Lactalbumin   |
| Sucrose                                   | 3.9           | 7.6    |                      | 28.5          | 46.0   |               |
| Carbohydrate (other than sucrose)         | 48.3          | 55.0   | Wheat, corn          | 32.72         | 16.3   | Corn, dextrin |
| Fat                                       | 7.0           | 17.7   | Soy, corn, fish oils | 10.6          | 24.4   | Corn oil      |
| Fiber                                     | 6.7           |        | Cellulose            | 5.0           |        | Cellulose     |
| Gross calculated caloric density (kCal/g) | 3.418         | 100.0  |                      | 3.927         | 100.0  |               |

**Table S2.** Two-way ANOVA analyses of the indicated measures, **Related to Figure 1.**

|                 | Average time to eat<br>2 replicates |         | Food consumed<br>(kCal/day) |         | Average bodyweight over<br>116 weeks |         |
|-----------------|-------------------------------------|---------|-----------------------------|---------|--------------------------------------|---------|
|                 | F (DFn, DFd)                        | P value | F (DFn, DFd)                | P value | F (DFn, DFd)                         | P value |
| Feeding regimen | F (1, 122) = 258.4                  | <0.0001 | F (2, 72) = 139.7           | <0.0001 | F (2, 336) = 322.5                   | <0.0001 |
| Diet type       | F (1, 122) = 35.46                  | <0.0001 | F (1, 72) = 115.5           | <0.0001 | F (1, 336) = 0.197                   | 0.6575  |
| Interaction     | F (1, 122) = 0.0429                 | 0.8363  | F (2, 72) = 10.86           | <0.0001 | F (2, 336) = 7.037                   | 0.0010  |

|                 | Insulin            |         | 3-h FBG            |         | HOMA-IR            |         |
|-----------------|--------------------|---------|--------------------|---------|--------------------|---------|
|                 | F (DFn, DFd)       | P value | F (DFn, DFd)       | P value | F (DFn, DFd)       | P value |
| Feeding regimen | F (2, 30) = 13.29  | <0.0001 | F (2, 41) = 6.72   | 0.0030  | F (2, 30) = 22.81  | <0.0001 |
| Diet type       | F (1, 30) = 1.989  | 0.1688  | F (1, 41) = 0.0594 | 0.8086  | F (1, 30) = 2.49   | 0.1250  |
| Interaction     | F (2, 30) = 0.0735 | 0.9293  | F (2, 41) = 1.117  | 0.3370  | F (2, 30) = 0.0532 | 0.9483  |

|                 | $\beta$ -hydroxybutyrate |         |
|-----------------|--------------------------|---------|
|                 | F (DFn, DFd)             | P value |
| Feeding regimen | F (2, 33) = 66.44        | <0.0001 |
| Diet type       | F (1, 33) = 15.06        | 0.0005  |
| Interaction     | F (2, 33) = 14.81        | <0.0001 |

**Table S3.** Lifespan statistics associated with the Kaplan-Meier survival curves for mice on the indicated feeding regimen and diet, **Related to Figures 2A-2C.**

| Diet                | Feeding |    | Lifespan analysis |       |        |       |         |
|---------------------|---------|----|-------------------|-------|--------|-------|---------|
|                     |         | n  | Mean              | 25%   | Median | 75%   | LogRank |
| NIA                 | AL      | 45 | 105.7 ± 3.6       | 88.6  | 103.7  | 120.4 | <0.001  |
|                     | MF      | 40 | 121.1 ± 3.6       | 107   | 122.9  | 134.9 |         |
|                     | CR      | 59 | 140.6 ± 3.1       | 121   | 140.1  | 160   |         |
| WIS                 | AL      | 44 | 106.8 ± 3.1       | 92    | 108.3  | 115.8 | <0.001  |
|                     | MF      | 41 | 118.5 ± 3.7       | 102.5 | 115.9  | 126.5 |         |
|                     | CR      | 62 | 136.2 ± 3.0       | 125.9 | 136.6  | 156.9 |         |
| Combined<br>NIA+WIS | AL      | 89 | 107.6 ± 2.4       | 92    | 107    | 121   | <0.001  |
|                     | MF      | 81 | 119.8 ± 2.6       | 105.9 | 121.7  | 134.9 |         |
|                     | CR      | 12 | 138.5 ± 2.1       | 124   | 140.1  | 159   |         |

LogRank test (Holm-Sidak method) was used. As there was no significant difference within feeding paradigms across diets (i.e. no significant difference in survival curves between NIA-AL and WIS-AL groups), diets were combined together to become a ‘combined diet group’. AL, *ad libitum*; MF, Meal-fed; CR, 30% calorie restriction.

**Table S4.** LogRank test with multiple comparisons (Holm-Sidak method), **Related to Figures 2A-2C.**

| Comparisons       | Statistic | P Value  |
|-------------------|-----------|----------|
| NIA-AL vs. NIA-CR | 44.338    | 8.29E-11 |
| NIA-MF vs. NIA-CR | 15.856    | 0.000137 |
| NIA-AL vs. NIA-MF | 6.176     | 0.0130   |
| WIS-AL vs. WIS-CR | 45.230    | 1.75E-11 |
| WIS-MF vs. WIS-CR | 14.774    | 0.000121 |
| WIS-AL vs. WIS-MF | 5.739     | 0.0166   |
| NIA-AL vs. WIS-AL | 0.00446   | 0.947    |
| NIA-MF vs. WIS-MF | 0.0188    | 0.891    |
| NIA-CR vs. WIS-CR | 1.553     | 0.213    |

**Table S5.** Kaplan-Meier survival curves were compared using LogRank test (Holm-Sidak method), **Related to Figures 2A-2C.**

| Diet type           | AL vs MF  |         | AL vs CR  |          | MF vs CR  |         |
|---------------------|-----------|---------|-----------|----------|-----------|---------|
|                     | Statistic | P value | Statistic | P value  | Statistic | P value |
| Combined<br>NIA+WIS | 6.9       | 0.0015  | 80.1      | 6.60E-20 | 38.5      | <0.0001 |

**Table S6.** Blinded histopathological analysis of tissues collected at death as scored by board certified veterinary pathologists, **Related to Figure 3.**

| Feeding paradigm                 |                             | NIA diet                    |                |                | WIS diet       |                |                |
|----------------------------------|-----------------------------|-----------------------------|----------------|----------------|----------------|----------------|----------------|
|                                  |                             | AL                          | MF             | CR             | AL             | MF             | CR             |
| Mean age at necropsy (weeks)     |                             | 104 ± 0.3                   | 117 ± 0.4      | 132 ± 0.2      | 110 ± 0.4      | 115 ± 0.3      | 135 ± 0.2      |
| N scored (% of total study mice) |                             | 33 (73.3)                   | 31 (77.5)      | 42 (71.2)      | 28 (63.6)      | 30 (73.2)      | 41 (66.1)      |
| Heart                            | Overall no pathology, n (%) | 9 (27.3)                    | 17 (54.8)      | 18 (42.9)      | 18 (64.3)      | 18 (60.0)      | 22 (53.7)      |
|                                  | Mineralization              | 3 (1.7 ± 0.7)               | 1 (1)          | 1 (1)          | 0 (0)          | 1 (1)          | 2 (1.0 ± 0)    |
|                                  | Degeneration                | 1 (1)                       | 0 (0)          | 0 (0)          | 1 (1)          | 1 (1)          | 1 (3)          |
|                                  | Amyloid                     | 21 (2.9 ± 0.25)             | 13 (2.8 ± 0.3) | 22 (2.7 ± 0.2) | 8 (2.9 ± 0.4)  | 9 (2.4 ± 0.4)  | 15 (3.1 ± 0.3) |
|                                  | Hemangiosarcoma             | 0 (0)                       | 0 (0)          | 0 (0)          | 1 (4)          | 0 (0)          | 0 (0)          |
|                                  | Necrosis                    | 0 (0)                       | 0 (0)          | 1 (1)          | 0 (0)          | 1 (1)          | 1 (1)          |
|                                  | Suppurative inflammation    | 0 (0)                       | 1 (3)          | 0 (0)          | 0 (0)          | 0 (0)          | 1 (1)          |
|                                  | Thrombosis                  | 2 (3 ± 1)                   | 0 (0)          | 2 (1.5 ± 0.5)  | 0 (0)          | 2 (2.0 ± 0)    | 2 (2.0 ± 0)    |
|                                  | Lymphoma                    | 1 (1)                       | 0 (0)          | 0 (0)          | 0 (0)          | 0 (0)          | 0 (0)          |
| Liver                            | Overall no pathology, n (%) | 11 (33.3)                   | 5 (16.1)       | 6 (14.3)       | 5 (17.9)       | 5 (16.7)       | 5 (12.2)       |
|                                  | Mineralization              | 2 (1.5 ± 0.5)               | 0 (0)          | 0 (0)          | 0 (0)          | 0 (0)          | 0 (0)          |
|                                  | Amyloid                     | 11 (1.5 ± 0.2)              | 8 (1.9 ± 0.1)  | 18 (1.6 ± 0.2) | 5 (1.6 ± 0.2)  | 2 (1.5 ± 0.5)  | 9 (1.9 ± 0.3)  |
|                                  | Hemisarcoma                 | 3 (3.7 ± 0.9)               | 1 (4)          | 0 (0)          | 4 (3.0 ± 0.7)  | 1 (5)          | 1 (5)          |
|                                  | Hepatocellular carcinoma    | 2 (2 ± 0)                   | 3 (2.0 ± 0.6)  | 0 (0)          | 6 (3.2 ± 0.4)  | 3 (3.3 ± 0.7)  | 4 (3.3 ± 0.3)  |
|                                  | Hyperplasia                 | 0 (0)                       | 0 (0)          | 2 (3.5 ± 0.5)  | 0 (0)          | 1 (2)          | 0 (0)          |
|                                  | Lipidosis                   | 0 (0)                       | 1 (1)          | 0 (0)          | 3 (2.7 ± 0.3)  | 6 (2.7 ± 0.3)  | 0 (0)          |
|                                  | Hepatoadenoma               | 0 (0)                       | 0 (0)          | 0 (0)          | 0 (0)          | 0 (0)          | 0 (0)          |
|                                  | Necrosis                    | 0 (0)                       | 1 (2)          | 1 (1)          | 1 (1)          | 1 (3)          | 1 (3)          |
|                                  | Cyst                        | 0 (0)                       | 0 (0)          | 0 (0)          | 1 (1)          | 0 (0)          | 0 (0)          |
|                                  | Lymphocytic infiltration    | 2 (1 ± 0)                   | 3 (1.0 ± 0)    | 3 (1.0 ± 0)    | 3 (1.0 ± 0)    | 4 (1.0 ± 0)    | 4 (1.3 ± 0.3)  |
|                                  | Lymphoma                    | 6 (2.2 ± 0.5)               | 11 (2.7 ± 0.4) | 16 (2.7 ± 0.2) | 8 (1.8 ± 0.3)  | 12 (2.5 ± 0.3) | 20 (2.5 ± 0.2) |
|                                  | Kidney                      | Overall no pathology, n (%) | 1 (3.03)       | 0 (0)          | 0 (0)          | 0 (0)          | 0 (0)          |
| Mineralization                   |                             | 12 (1.1 ± 0.1)              | 7 (1.0 ± 0)    | 16 (1.1 ± 0.1) | 14 (1.0 ± 0)   | 15 (1.1 ± 0.1) | 19 (1.4 ± 0.3) |
| Degeneration                     |                             | 0 (0)                       | 0 (0)          | 0 (0)          | 0 (0)          | 0 (0)          | 0 (0)          |
| Amyloid                          |                             | 13 (4.4 ± 0.2)              | 9 (4.0 ± 0.4)  | 19 (3.8 ± 0.3) | 8 (3.8 ± 0.4)  | 4 (2.8 ± 0.9)  | 18 (3.2 ± 0.4) |
| Glomerulonephritis               |                             | 32 (3.0 ± 0.3)              | 31 (2.5 ± 0.2) | 41 (2.9 ± 0.2) | 27 (2.8 ± 0.2) | 30 (2.8 ± 0.2) | 41 (2.8 ± 0.2) |
| Hydronephritis                   |                             | 1 (4)                       | 1 (4)          | 0 (0)          | 0 (0)          | 1 (2)          | 0 (0)          |
| Necrosis                         |                             | 0 (0)                       | 0 (0)          | 0 (0)          | 0 (0)          | 1 (2)          | 0 (0)          |
| Adenoma                          |                             | 1 (4)                       | 0 (0)          | 0 (0)          | 0 (0)          | 0 (0)          | 0 (0)          |
| Cyst                             |                             | 1 (1)                       | 0 (0)          | 0 (0)          | 0 (0)          | 1 (1)          | 3 (2.0 ± 0.6)  |
| Carcinoma                        |                             | 0 (0)                       | 0 (0)          | 1 (2)          | 0 (0)          | 0 (0)          | 1 (4)          |

|             |                                |                |                |                |                |                |                |
|-------------|--------------------------------|----------------|----------------|----------------|----------------|----------------|----------------|
|             | Lymphocytic infiltration       | 12 (1.2 ± 0.1) | 9 (1.0 ± 0)    | 10 (1.2 ± 0.1) | 9 (1.2 ± 0.1)  | 13 (1.3 ± 0.1) | 11 (1.0 ± 0)   |
|             | Suppurative inflammation       | 0 (0)          | 0 (0)          | 0 (0)          | 0 (0)          | 0 (0)          | 1 (3)          |
|             | Lymphoma                       | 3 (2.3 ± 0.3)  | 3 (2.7 ± 1.2)  | 1 (2)          | 6 (2.3 ± 0.2)  | 6 (1.5 ± 0.2)  | 3 (1.3 ± 0.3)  |
| Spleen      | Overall no pathology, n (%)    | 12 (36.4)      | 11 (35.5)      | 15 (35.7)      | 15 (53.6)      | 21 (70.0)      | 20 (48.8)      |
|             | Mineralization                 | 0 (0)          | 0 (0)          | 0 (0)          | 0 (0)          | 0 (0)          | 0 (0)          |
|             | Degeneration                   | 0 (0)          | 0 (0)          | 0 (0)          | 0 (0)          | 0 (0)          | 0 (0)          |
|             | Amyloid                        | 14 (4.5 ± 0.3) | 11 (4.5 ± 0.4) | 21 (4.6 ± 0.2) | 5 (4.2 ± 0.4)  | 1 (5)          | 13 (3.8 ± 0.4) |
|             | Hemisarcoma                    | 4 (4 ± 0.4)    | 0 (0)          | 1 (1)          | 3 (4.0 ± 0.6)  | 1 (5)          | 1 (4)          |
|             | Hyperplasia                    | 0 (0)          | 1 (3)          | 0 (0)          | 0 (0)          | 0 (0)          | 0 (0)          |
|             | Necrosis                       | 0 (0)          | 0 (0)          | 0 (0)          | 0 (0)          | 0 (0)          | 0 (0)          |
|             | Carcinoma                      | 0 (0)          | 0 (0)          | 0 (0)          | 0 (0)          | 0 (0)          | 0 (0)          |
|             | Lymphocytic infiltration       | 0 (0)          | 0 (0)          | 0 (0)          | 0 (0)          | 0 (0)          | 0 (0)          |
|             | Suppurative inflammation       | 0 (0)          | 0 (0)          | 0 (0)          | 0 (0)          | 0 (0)          | 0 (0)          |
|             | Lymphoma                       | 4 (2.5 ± 0.6)  | 6 (2.2 ± 0.6)  | 5 (2.4 ± 0.7)  | 5 (1.6 ± 0.2)  | 7 (1.1 ± 0.1)  | 6 (1.8 ± 0.3)  |
| Lung        | Overall no pathology, n (%)    | 10 (30.3)      | 12 (38.7)      | 10 (23.8)      | 6 (21.4)       | 8 (26.7)       | 7 (17.1)       |
|             | Mineralization                 | 0 (0)          | 0 (0)          | 0 (0)          | 0 (0)          | 0 (0)          | 0 (0)          |
|             | Congestion                     | 0 (0)          | 0 (0)          | 1 (3)          | 0 (0)          | 0 (0)          | 0 (0)          |
|             | Amyloid                        | 1 (1)          | 1 (1)          | 2 (1.5 ± 0.5)  | 1 (1)          | 2 (1.5 ± 0.5)  | 1 (2)          |
|             | Thrombosis                     | 0 (0)          | 0 (0)          | 0 (0)          | 0 (0)          | 1 (2)          | 1 (1)          |
|             | Hyperplasia                    | 0 (0)          | 0 (0)          | 0 (0)          | 0 (0)          | 0 (0)          | 0 (0)          |
|             | Alveolar/bronchiolar carcinoma | 1 (5)          | 0 (0)          | 0 (0)          | 1 (4)          | 3 (1.7 ± 0.7)  | 0 (0)          |
|             | Edema                          | 1 (4)          | 0 (0)          | 0 (0)          | 1 (3)          | 0 (0)          | 0 (0)          |
|             | Necrosis                       | 0 (0)          | 0 (0)          | 0 (0)          | 0 (0)          | 0 (0)          | 0 (0)          |
|             | Alveolar/bronchiolar adenoma   | 5 (1.2 ± 0.2)  | 6 (1.8 ± 0.2)  | 8 (1.6 ± 0.4)  | 4 (2.0 ± 0.2)  | 7 (1.6 ± 0.2)  | 6 (1.3 ± 0.2)  |
|             | Alveolar proteinosis           | 2 (3 ± 2)      | 1 (2)          | 0 (0)          | 1 (3)          | 0 (0)          | 0 (0)          |
|             | Lymphocytic infiltration       | 14 (1.3 ± 0.1) | 10 (1.7 ± 0.2) | 19 (1.1 ± 0.1) | 13 (1.4 ± 0.2) | 10 (1.2 ± 0.1) | 16 (1.2 ± 0.1) |
|             | Suppurative inflammation       | 0 (0)          | 0 (0)          | 0 (0)          | 0 (0)          | 2 (1.5 ± 0.5)  | 0 (0)          |
|             | Lymphoma                       | 5 (2.4 ± 0.4)  | 8 (2.1 ± 0.3)  | 11 (2.2 ± 0.3) | 6 (2.3 ± 0.3)  | 8 (2.3 ± 0.4)  | 13 (2.7 ± 0.2) |
| Pancreas    | Overall no pathology, n (%)    | 23 (69.7)      | 26 (83.9)      | 30 (71.4)      | 23 (82.1)      | 27 (90.0)      | 32 (78.0)      |
|             | Mineralization                 | 1 (2)          | 0 (0)          | 0 (0)          | 0 (0)          | 0 (0)          | 0 (0)          |
|             | Amyloid                        | 7 (1.1 ± 0.1)  | 3 (1.0 ± 0)    | 9 (1.6 ± 0.2)  | 5 (1.6 ± 0.2)  | 1 (1)          | 8 (1.9 ± 0.4)  |
|             | Lymphocytic infiltration       | 0 (0)          | 0 (0)          | 0 (0)          | 0 (0)          | 1 (2)          | 0 (0)          |
|             | Suppurative inflammation       | 0 (0)          | 0 (0)          | 0 (0)          | 0 (0)          | 0 (0)          | 0 (0)          |
|             | Lymphoma                       | 0 (0)          | 1 (1)          | 2 (1.5 ± 0.5)  | 0 (0)          | 1 (1)          | 1 (2)          |
| Lymph nodes | Overall no pathology, n (%)    | 17 (51.1)      | 20 (64.5)      | 24 (57.1)      | 16 (57.1)      | 21 (70.0)      | 25 (61.0)      |



|                          |               |               |               |               |               |                |
|--------------------------|---------------|---------------|---------------|---------------|---------------|----------------|
| Mineralization           | 0 (0)         | 0 (0)         | 0 (0)         | 0 (0)         | 0 (0)         | 0 (0)          |
| Amyloid                  | 0 (0)         | 1 (1)         | 0 (0)         | 0 (0)         | 0 (0)         | 0 (0)          |
| Lymphocytic infiltration | 0 (0)         | 0 (0)         | 0 (0)         | 0 (0)         | 0 (0)         | 0 (0)          |
| Suppurative inflammation | 0 (0)         | 0 (0)         | 0 (0)         | 0 (0)         | 0 (0)         | 0 (0)          |
| Lymphoma                 | 4 (3.5 ± 1.0) | 9 (3.0 ± 0.4) | 5 (3.8 ± 0.2) | 5 (2.6 ± 1.0) | 9 (1.8 ± 0.3) | 12 (1.8 ± 0.4) |
